# Supplementary material for: Synthesis, characterization, magnetism and theoretical analysis of hetero-metallic [Ni2Ln2] partial di-cubane assemblies
Source: Royal Society of Chemistry journal article supplement (doi:10.1039/d1dt00510c), 2021-01-01
Supplement: d1dt00510c1.pdf [file d1dt00510c1.pdf]

## **Electronic Supporting Information**

### **Synthesis, Characterization, Magnetism and Theoretical Analysis of Hetero-metallic [Ni<sub>2</sub>Ln<sub>2</sub>] Partial Di-cubane Assemblies**

Avik Bhanja,<sup>a</sup> Radovan Herchel,<sup>b</sup> Eufemio Moreno-Pineda<sup>c</sup>, Anjan Khara<sup>a</sup>, Wolfgang Wernsdorfer<sup>d,e</sup>, Debashis Ray<sup>\*a</sup>

<sup>a</sup> *Department of Chemistry, Indian Institute of Technology, Kharagpur 721302, India*

<sup>b</sup> *Department of Inorganic Chemistry, Faculty of Science, Palacky University, 17. listopadu 12, CZ-771 46 Olomouc, Czech Republic*

<sup>c</sup> *Depto. de Química-Física, Escuela de Química, Facultad de Ciencias Naturales, Exactas y Tecnología, Universidad de Panamá, Panamá, Panamá*

<sup>d</sup> *Institute for Quantum Materials and Technology (IQMT), Karlsruhe Institute of Technology (KIT), Hermann-von-Helmholtz-Platz 1, D-76344 Eggenstein-Leopoldshafen, Germany.*

<sup>e</sup> *Physikalisches Institut, Karlsruhe Institute of Technology, D-76131 Karlsruhe, Germany.*

\*E-mail: [dray@chem.iitkgp.ac.in](mailto:dray@chem.iitkgp.ac.in)

## Contents

|                                                                                |       |
|--------------------------------------------------------------------------------|-------|
| 1. Crystallographic data and refinement details for complexes <b>1–4</b> ..... | 3     |
| 2. Observed metal ion binding modes of ligand H <sub>2</sub> L.....            | 3     |
| 3. SHAPE analysis of the metal ion centres.....                                | 4     |
| 4. FTIR spectra of complexes <b>1, 2, 3</b> and <b>4</b> .....                 | 4     |
| 5. H-bonding of complex <b>1</b> .....                                         | 5     |
| 6. Powder XRD pattern of complexes <b>1, 2, 3</b> and <b>4</b> .....           | 5     |
| 7. Asymmetric unit of complex <b>1</b> .....                                   | 5     |
| 8. Detail crystallographic table for complexes <b>1</b> .....                  | 6-7   |
| 9. Molecular structure of Complex <b>2</b> .....                               | 7     |
| 10. Detail crystallographic table for complexes <b>2</b> .....                 | 7-8   |
| 11. Molecular structure of Complex <b>3</b> .....                              | 9     |
| 12. Detail crystallographic table for complexes <b>3</b> .....                 | 9-10  |
| 13. Molecular structure of Complex <b>4</b> .....                              | 10    |
| 14. Detail crystallographic table for complexes <b>4</b> .....                 | 11-12 |
| 15. CASSCF calculation for <b>1–4</b> .....                                    | 12-14 |
| 16. Fitting of experimental magnetic data calculated with POLY_ANISO.....      | 16    |

**Table S1** Crystallographic data and structure refinement details of **1–4**

| Parameters                                            | 1                                                                                              | 2                                                                                              | 3                                                                                              | 4                                                                                              |
|-------------------------------------------------------|------------------------------------------------------------------------------------------------|------------------------------------------------------------------------------------------------|------------------------------------------------------------------------------------------------|------------------------------------------------------------------------------------------------|
| Formula                                               | C <sub>66</sub> H <sub>76</sub> Gd <sub>2</sub> N <sub>2</sub> Ni <sub>2</sub> O <sub>22</sub> | C <sub>66</sub> H <sub>76</sub> Tb <sub>2</sub> N <sub>2</sub> Ni <sub>2</sub> O <sub>22</sub> | C <sub>66</sub> H <sub>76</sub> Dy <sub>2</sub> N <sub>2</sub> Ni <sub>2</sub> O <sub>22</sub> | C <sub>66</sub> H <sub>76</sub> Ho <sub>2</sub> N <sub>2</sub> Ni <sub>2</sub> O <sub>22</sub> |
| F.W.(g mol <sup>-1</sup> )                            | 1681.20                                                                                        | 1684.54                                                                                        | 1691.70                                                                                        | 1696.56                                                                                        |
| crystal system                                        | triclinic                                                                                      | triclinic                                                                                      | triclinic                                                                                      | triclinic                                                                                      |
| space group                                           | $\bar{1}$                                                                                      | $\bar{1}$                                                                                      | $\bar{1}$                                                                                      | $\bar{1}$                                                                                      |
| Crystal color                                         | Green                                                                                          | Green                                                                                          | Green                                                                                          | Green                                                                                          |
| Crystal size/mm <sup>3</sup>                          | 0.16×0.14×0.12                                                                                 | 0.18×0.12×0.10                                                                                 | 0.17×0.15×0.10                                                                                 | 0.18×0.16×0.12                                                                                 |
| a/ Å                                                  | 11.366(12)                                                                                     | 11.272(10)                                                                                     | 11.108(18)                                                                                     | 11.072(9)                                                                                      |
| b/ Å                                                  | 11.446(13)                                                                                     | 11.493(12)                                                                                     | 11.279(18)                                                                                     | 11.326(10)                                                                                     |
| c/ Å                                                  | 13.959(15)                                                                                     | 13.955(12)                                                                                     | 13.69(2)                                                                                       | 13.677(11)                                                                                     |
| $\alpha$ / deg                                        | 78.54(3)                                                                                       | 78.47(2)                                                                                       | 101.289(19)                                                                                    | 101.34(3)                                                                                      |
| $\beta$ / deg                                         | 76.46(4)                                                                                       | 76.06(2)                                                                                       | 103.51(2)                                                                                      | 103.396(12)                                                                                    |
| $\gamma$ / deg                                        | 89.78(3)                                                                                       | 89.62(4)                                                                                       | 90.45(2)                                                                                       | 90.601(11)                                                                                     |
| V/ Å <sup>3</sup>                                     | 1729(3)                                                                                        | 1718(3)                                                                                        | 1633(5)                                                                                        | 1633(2)                                                                                        |
| Z                                                     | 1                                                                                              | 1                                                                                              | 1                                                                                              | 1                                                                                              |
| limiting indices                                      | -15 ≤ h ≤ 13<br>-16 ≤ k ≤ 16<br>-16 ≤ l ≤ 19                                                   | -13 ≤ h ≤ 14<br>-14 ≤ k ≤ 12<br>-17 ≤ l ≤ 17                                                   | -13 ≤ h ≤ 15<br>-14 ≤ k ≤ 14<br>-18 ≤ l ≤ 15                                                   | 13 ≤ h ≤ 13<br>-14 ≤ k ≤ 14<br>-17 ≤ l ≤ 16                                                    |
| D <sub>c</sub> /g cm <sup>-3</sup>                    | 1.615                                                                                          | 1.628                                                                                          | 1.721                                                                                          | 1.725                                                                                          |
| $\mu$ (mm <sup>-1</sup> )                             | 2.504                                                                                          | 2.648                                                                                          | 2.910                                                                                          | 3.043                                                                                          |
| F(000)                                                | 846                                                                                            | 848                                                                                            | 850                                                                                            | 852                                                                                            |
| T/K                                                   | 296                                                                                            | 290                                                                                            | 296                                                                                            | 296                                                                                            |
| Total reflections                                     | 22749                                                                                          | 21741                                                                                          | 22578                                                                                          | 20893                                                                                          |
| R(int)                                                | 0.0683                                                                                         | 0.0540                                                                                         | 0.0378                                                                                         | 0.0244                                                                                         |
| Unique reflections                                    | 9271                                                                                           | 7022                                                                                           | 7839                                                                                           | 6480                                                                                           |
| Observed reflections                                  | 5501                                                                                           | 5786                                                                                           | 7051                                                                                           | 6068                                                                                           |
| Parameters                                            | 430                                                                                            | 430                                                                                            | 430                                                                                            | 430                                                                                            |
| R <sub>1</sub> ; wR <sub>2</sub> (I > 2 $\sigma$ (I)) | 0.0597, 0.1904                                                                                 | 0.0273, 0.0651                                                                                 | 0.0397, 0.1040                                                                                 | 0.0236, 0.0724                                                                                 |
| GOF (F <sup>2</sup> )                                 | 0.978                                                                                          | 1.067                                                                                          | 1.045                                                                                          | 1.155                                                                                          |
| Largest diff peak and hole (e Å <sup>-3</sup> )       | 2.245, -2.513                                                                                  | 0.611, -0.575                                                                                  | 3.634, -1.023                                                                                  | 1.064, -0.550                                                                                  |
| CCDC No.                                              | 2062614                                                                                        | 2062615                                                                                        | 2062616                                                                                        | 2062617                                                                                        |

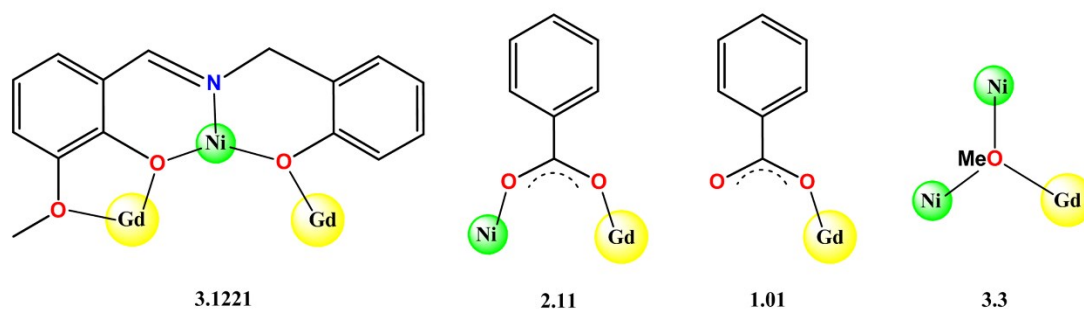**Figure S1.** Binding sites and coordination modes<sup>S1</sup> of L<sup>2-</sup>, PhCOO<sup>-</sup> and MeO<sup>-</sup>

**Table S2** Results of continuous shape measures calculations<sup>S2-S3</sup> using program SHAPE 2.1 for Ni<sup>II</sup> atoms of complexes **1–4**.<sup>a</sup>

|                 | JPPY-6 | TPR-6  | <b>OC-6</b>  | PPY-6  | HP-6   |
|-----------------|--------|--------|--------------|--------|--------|
| Ni1 of <b>1</b> | 27.388 | 12.266 | <b>0.751</b> | 23.871 | 28.704 |
| Ni1 of <b>2</b> | 27.511 | 12.193 | <b>0.725</b> | 24.039 | 28.930 |
| Ni1 of <b>3</b> | 27.513 | 12.161 | <b>0.743</b> | 24.021 | 28.932 |
| Ni1 of <b>4</b> | 27.705 | 12.203 | <b>0.719</b> | 24.200 | 28.964 |

<sup>a</sup>JPPY-6 = Johnson pentagonal pyramid J2, TPR-6 = Trigonal prism, OC-6 = Octahedron, PPY-6 = Pentagonal pyramid, HP-6 = Hexagon

**Table S3** Results of continuous shape measures calculations<sup>S2-S3</sup> using program SHAPE 2.1 for Ln<sup>III</sup> atoms of **1–4**.<sup>a</sup>

| [ML8]           | OP-8   | HPY-8  | HBPY-8 | CU-8   | SAPR-8 | <b>TDD-8</b> | JGBF-8 | JETBPY-8 | JBTPR-8 | BTPR-8 | JSD-8 | TT-8   |
|-----------------|--------|--------|--------|--------|--------|--------------|--------|----------|---------|--------|-------|--------|
| Gd1 of <b>1</b> | 30.475 | 23.223 | 16.315 | 9.940  | 1.684  | <b>1.193</b> | 13.581 | 27.712   | 2.829   | 2.460  | 3.502 | 10.430 |
| Tb1 of <b>2</b> | 30.716 | 23.268 | 16.413 | 10.047 | 1.701  | <b>1.190</b> | 13.405 | 27.952   | 2.711   | 2.406  | 3.410 | 10.512 |
| Dy1 of <b>3</b> | 30.699 | 23.503 | 16.326 | 9.819  | 1.654  | <b>1.089</b> | 13.486 | 28.167   | 2.661   | 2.386  | 3.302 | 10.260 |
| Ho1 of <b>4</b> | 30.585 | 23.583 | 16.454 | 9.968  | 1.674  | <b>1.091</b> | 13.301 | 28.153   | 2.578   | 2.342  | 3.219 | 10.389 |

<sup>a</sup>OP-8 = Octagon, HPY-8 = Heptagonal pyramid, HBPY-8 = Hexagonal bipyramid, CU-8 = Cube, SAPR-8 = square antiprism, TDD-8 = Triangular dodecahedron, JGBF-8 = Johnson gyrobifastigium J26, JETBPY-8 = Johnson elongated triangular bipyramid J14, JBTPR-8 = Biaugmented trigonal prism J50, BTPR-8 = Biaugmented trigonal prism, JSD-8 = Snub diphenooid J84, TT-8 = Triakis tetrahedron

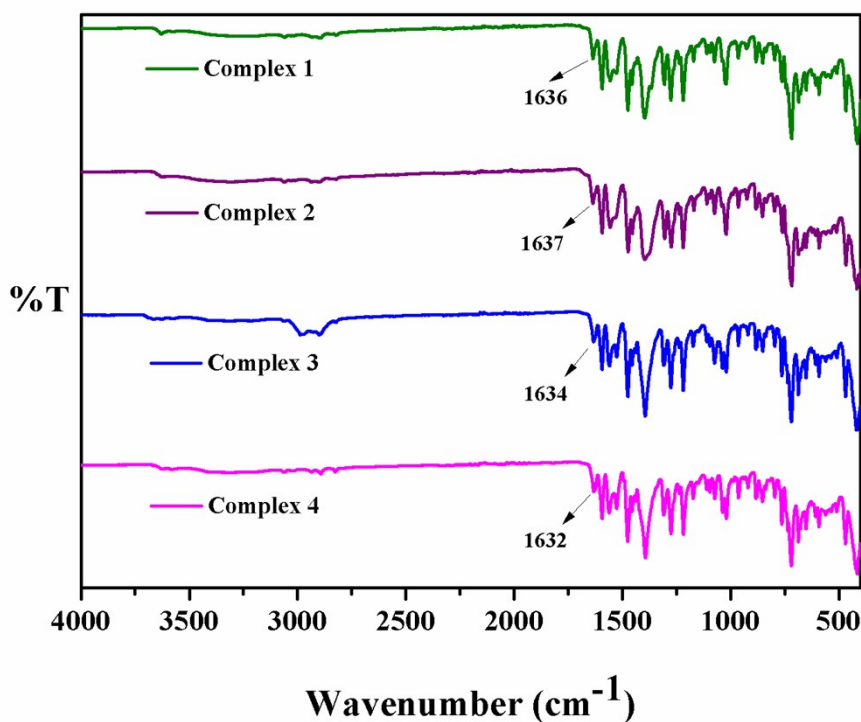

**Fig. S2** FTIR spectra of Complex **1**, Complex **2**, Complex **3** and Complex **4**

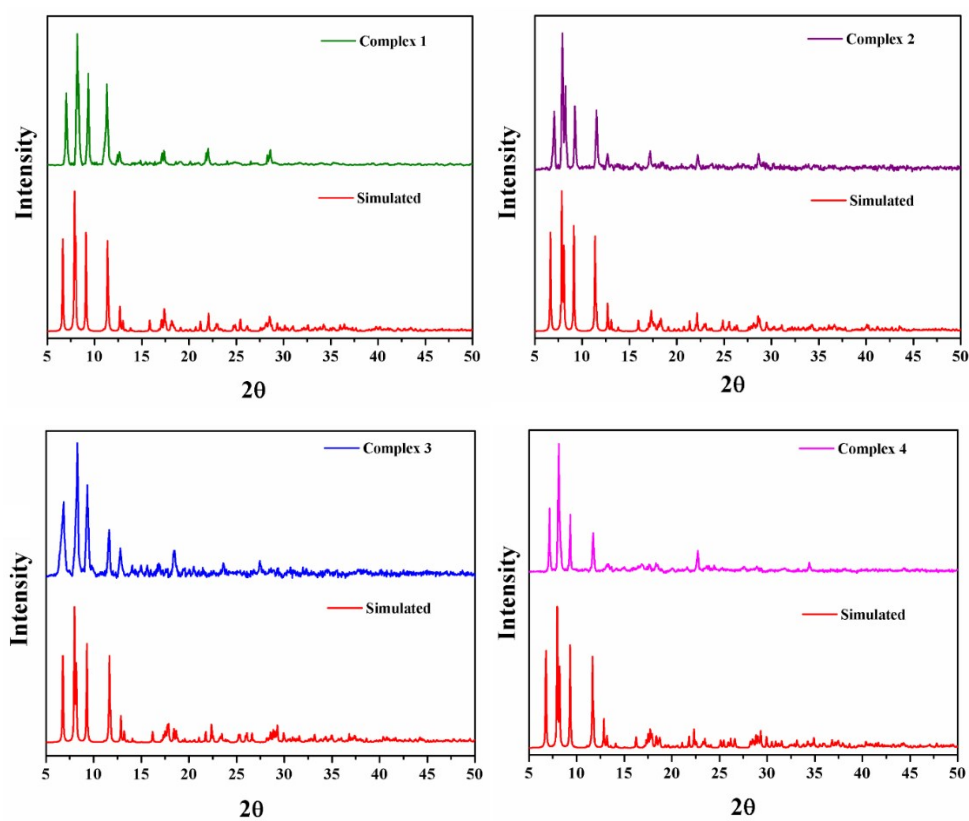

**Fig. S3** PXR D patterns of Complexes 1–4

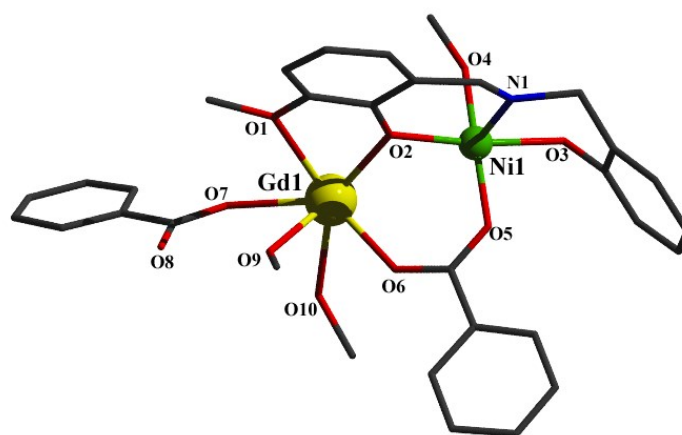

**Fig. S4** Asymmetric unit of complex 1 with partial atom numbering scheme.

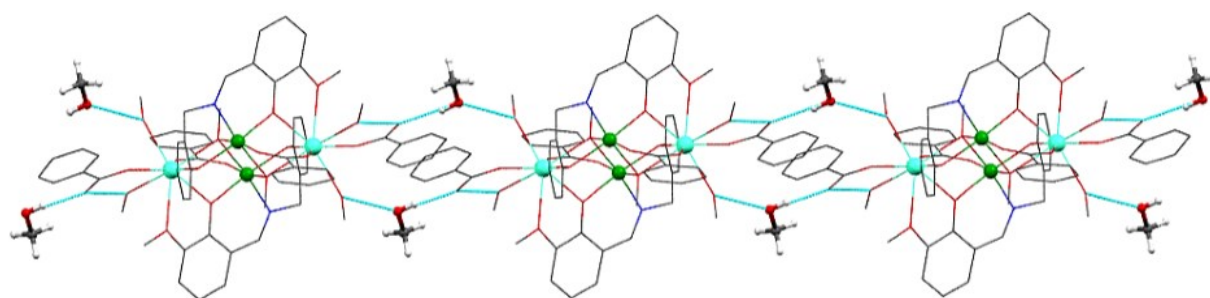

**Fig. S5** 1D-chain like H-bonding present in complex 1 through solvent MeOH.

**Table S4** Selected bond distances of **1**

| Atom 1 | Atom 2 | Distance [Å] |  | Atom 1 | Atom 2 | Distance [Å] |
|--------|--------|--------------|--|--------|--------|--------------|
| Gd1    | O2     | 2.297(5)     |  | Gd1    | O1     | 2.646(6)     |
| Gd1    | O3     | 2.313(5)     |  | Ni1    | O2     | 2.009(5)     |
| Gd1    | O4     | 2.367(5)     |  | Ni1    | O5     | 2.048(5)     |
| Gd1    | O6     | 2.376(5)     |  | Ni1    | O4     | 2.057(5)     |
| Gd1    | O7     | 2.383(5)     |  | Ni1    | O3     | 2.070(5)     |
| Gd1    | O9     | 2.445(5)     |  | Ni1    | O4     | 2.124(5)     |
| Gd1    | O10    | 2.445(7)     |  | Ni1    | N1     | 2.064(6)     |

**Table S5** Selected bond angles of **1**

| Atom 1 | Atom 2 | Atom 3 | Bond<br>Angles(°) |  | Atom 1 | Atom 2 | Atom 3 | Bond<br>Angles(°) |
|--------|--------|--------|-------------------|--|--------|--------|--------|-------------------|
| O2     | Gd1    | O3     | 84.06(18)         |  | O6     | Gd1    | O1     | 114.50(19)        |
| O2     | Gd1    | O4     | 72.38(17)         |  | O7     | Gd1    | O1     | 77.2(2)           |
| O3     | Gd1    | O4     | 69.98(16)         |  | O9     | Gd1    | O1     | 70.0(2)           |
| O2     | Gd1    | O6     | 77.1(2)           |  | O10    | Gd1    | O1     | 144.93(19)        |
| O3     | Gd1    | O6     | 144.55(17)        |  | O2     | Ni1    | O5     | 91.7(2)           |
| O4     | Gd1    | O6     | 75.78(17)         |  | O2     | Ni1    | O4     | 93.3(2)           |
| O2     | Gd1    | O7     | 137.55(19)        |  | O5     | Ni1    | O4     | 169.9(2)          |
| O3     | Gd1    | O7     | 79.60(18)         |  | O2     | Ni1    | N1     | 90.1(2)           |
| O4     | Gd1    | O7     | 134.76(18)        |  | O5     | Ni1    | N1     | 89.0(2)           |
| O6     | Gd1    | O7     | 133.50(19)        |  | O4     | Ni1    | N1     | 99.8(2)           |
| O2     | Gd1    | O9     | 100.6(2)          |  | O2     | Ni1    | O3     | 173.4(2)          |
| O3     | Gd1    | O9     | 143.01(19)        |  | O5     | Ni1    | O3     | 94.4(2)           |
| O4     | Gd1    | O9     | 146.59(17)        |  | O4     | Ni1    | O3     | 81.13(18)         |
| O6     | Gd1    | O9     | 70.83(19)         |  | N1     | Ni1    | O3     | 87.4(2)           |
| O7     | Gd1    | O9     | 72.32(19)         |  | O2     | Ni1    | O4     | 83.53(19)         |
| O2     | Gd1    | O10    | 151.16(19)        |  | O5     | Ni1    | O4     | 89.2(2)           |
| O3     | Gd1    | O10    | 107.6(2)          |  | O4     | Ni1    | O4     | 82.6(2)           |
| O4     | Gd1    | O10    | 86.68(19)         |  | N1     | Ni1    | O4     | 173.3(2)          |
| O6     | Gd1    | O10    | 78.7(2)           |  | O3     | Ni1    | O4     | 99.18(19)         |

|    |     |     |            |  |     |    |     |            |
|----|-----|-----|------------|--|-----|----|-----|------------|
| O7 | Gd1 | O10 | 71.3(2)    |  | Ni1 | O4 | Ni1 | 97.4(2)    |
| O9 | Gd1 | O10 | 85.9(2)    |  | Ni1 | O4 | Gd1 | 103.72(19) |
| O2 | Gd1 | O1  | 61.56(18)  |  | Ni1 | O4 | Gd1 | 98.15(19)  |
| O3 | Gd1 | O1  | 80.79(19)  |  | Ni1 | O2 | Gd1 | 103.9(2)   |
| O4 | Gd1 | O1  | 127.32(18) |  | Ni1 | O3 | Gd1 | 105.2(2)   |

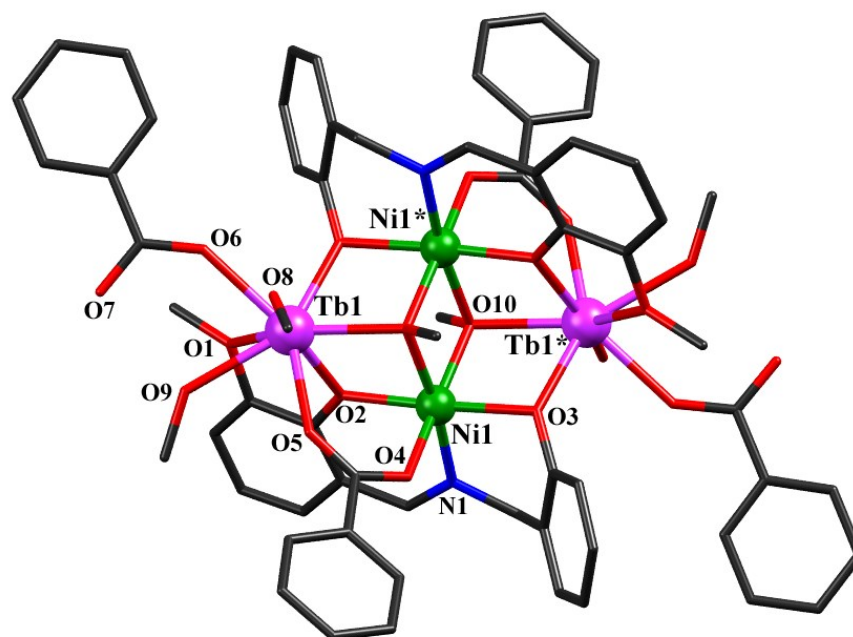

**Fig. S6** Molecular structure of Complex **2** with partial atomic numbering scheme. Solvent molecules are omitted for clarity.

**Table S6** Selected bond distances of **2**

| Atom 1 | Atom 2 | Distance [Å] | Atom 1 | Atom 2 | Distance [Å] |
|--------|--------|--------------|--------|--------|--------------|
| Tb1    | O2     | 2.281(3)     | Tb1    | O1     | 2.665(3)     |
| Tb1    | O3     | 2.293(3)     | Ni1    | O2     | 2.013(3)     |
| Tb1    | O5     | 2.344(3)     | Ni1    | O4     | 2.033(3)     |
| Tb1    | O6     | 2.353(3)     | Ni1    | O10    | 2.048(3)     |
| Tb1    | O10    | 2.356(3)     | Ni1    | N1     | 2.057(3)     |
| Tb1    | O9     | 2.412(3)     | Ni1    | O3     | 2.066(3)     |
| Tb1    | O8     | 2.426(3)     | Ni1    | O10    | 2.130(3)     |

**Table S7** Selected bond angles of **2**

| Atom 1 | Atom 2 | Atom 3 | Bond Angles(°) | Atom 1 | Atom 2 | Atom 3 | Bond Angles(°) |
|--------|--------|--------|----------------|--------|--------|--------|----------------|
| O2     | Tb1    | O3     | 84.34(11)      | O6     | Tb1    | O1     | 76.47(10)      |
| O2     | Tb1    | O5     | 77.06(10)      | O10    | Tb1    | O1     | 128.28(9)      |
| O3     | Tb1    | O5     | 144.87(9)      | O9     | Tb1    | O1     | 69.18(11)      |
| O2     | Tb1    | O6     | 136.80(9)      | O8     | Tb1    | O1     | 144.42(9)      |
| O3     | Tb1    | O6     | 78.92(9)       | O2     | Ni1    | O4     | 92.41(10)      |
| O5     | Tb1    | O6     | 134.01(10)     | O2     | Ni1    | O10    | 92.67(10)      |
| O2     | Tb1    | O10    | 73.33(9)       | O4     | Ni1    | O10    | 170.22(9)      |
| O3     | Tb1    | O10    | 70.41(9)       | O2     | Ni1    | N1     | 89.60(11)      |
| O5     | Tb1    | O10    | 75.77(10)      | O4     | Ni1    | N1     | 88.19(12)      |
| O6     | Tb1    | O10    | 134.39(10)     | O10    | Ni1    | N1     | 100.20(12)     |
| O2     | Tb1    | O9     | 99.71(11)      | O2     | Ni1    | O3     | 173.19(10)     |
| O3     | Tb1    | O9     | 142.54(10)     | O4     | Ni1    | O3     | 93.99(10)      |
| O5     | Tb1    | O9     | 70.83(11)      | O10    | Ni1    | O3     | 81.34(10)      |
| O6     | Tb1    | O9     | 72.83(10)      | N1     | Ni1    | O3     | 88.28(11)      |
| O10    | Tb1    | O9     | 146.58(9)      | O2     | Ni1    | O10    | 83.86(10)      |
| O2     | Tb1    | O8     | 151.59(9)      | O4     | Ni1    | O10    | 89.81(11)      |
| O3     | Tb1    | O8     | 107.46(12)     | O10    | Ni1    | O10    | 82.44(11)      |
| O5     | Tb1    | O8     | 78.99(11)      | N1     | Ni1    | O10    | 173.07(10)     |
| O6     | Tb1    | O8     | 71.56(10)      | O3     | Ni1    | O10    | 98.48(10)      |
| O10    | Tb1    | O8     | 86.17(9)       | Ni1    | O10    | Ni1    | 97.56(11)      |
| O9     | Tb1    | O8     | 86.54(12)      | Ni1    | O10    | Tb1    | 103.32(10)     |
| O2     | Tb1    | O1     | 61.60(10)      | Ni1    | O10    | Tb1    | 97.39(10)      |
| O3     | Tb1    | O1     | 80.78(11)      | Ni1    | O2     | Tb1    | 103.38(10)     |
| O5     | Tb1    | O1     | 114.50(11)     | Ni1    | O3     | Tb1    | 104.92(10)     |



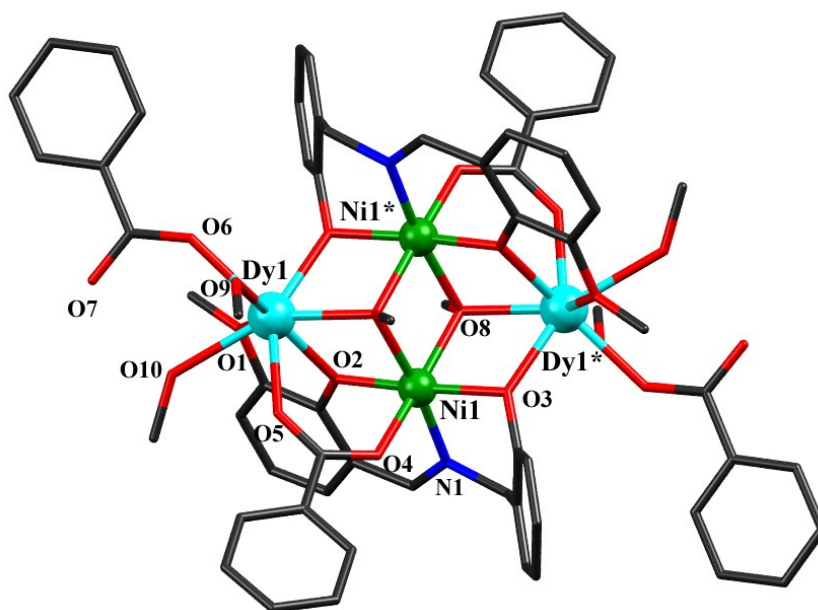

**Fig. S7** Molecular structure of Complex **3** with partial atomic numbering scheme. Solvent molecules are omitted for clarity.

**Table S8** Selected bond distances of **3**

| Atom 1 | Atom 2 | Distance [Å] | Atom 1 | Atom 2 | Distance [Å] |
|--------|--------|--------------|--------|--------|--------------|
| Dy1    | O2     | 2.256(3)     | Dy1    | O1     | 2.621(4)     |
| Dy1    | O3     | 2.261(4)     | Ni1    | O2     | 1.985(4)     |
| Dy1    | O8     | 2.325(4)     | Ni1    | O4     | 2.022(4)     |
| Dy1    | O6     | 2.327(4)     | Ni1    | O8     | 2.036(4)     |
| Dy1    | O5     | 2.330(4)     | Ni1    | N1     | 2.046(4)     |
| Dy1    | O9     | 2.377(4)     | Ni1    | O3     | 2.050(4)     |
| Dy1    | O10    | 2.378(4)     | Ni1    | O8     | 2.107(3)     |

**Table S9** Selected bond angles of **3**

| Atom 1 | Atom 2 | Atom 3 | Bond Angles(°) | Atom 1 | Atom 2 | Atom 3 | Bond Angles(°) |
|--------|--------|--------|----------------|--------|--------|--------|----------------|
| O2     | Dy1    | O3     | 84.27(15)      | O6     | Dy1    | O1     | 76.77(13)      |
| O2     | Dy1    | O8     | 72.95(13)      | O5     | Dy1    | O1     | 114.91(14)     |
| O3     | Dy1    | O8     | 70.82(11)      | O9     | Dy1    | O1     | 145.31(11)     |
| O2     | Dy1    | O6     | 137.46(11)     | O10    | Dy1    | O1     | 70.24(16)      |
| O3     | Dy1    | O6     | 78.46(11)      | O2     | Ni1    | O4     | 92.24(13)      |

|    |     |     |            |  |     |     |     |            |
|----|-----|-----|------------|--|-----|-----|-----|------------|
| O8 | Dy1 | O6  | 133.94(14) |  | O2  | Ni1 | O8  | 92.89(13)  |
| O2 | Dy1 | O5  | 77.12(15)  |  | O4  | Ni1 | O8  | 169.96(11) |
| O3 | Dy1 | O5  | 145.56(11) |  | O2  | Ni1 | N1  | 89.79(15)  |
| O8 | Dy1 | O5  | 76.08(14)  |  | O4  | Ni1 | N1  | 88.48(16)  |
| O6 | Dy1 | O5  | 133.77(12) |  | O8  | Ni1 | N1  | 100.16(17) |
| O2 | Dy1 | O9  | 150.79(11) |  | O2  | Ni1 | O3  | 173.36(12) |
| O3 | Dy1 | O9  | 107.20(17) |  | O4  | Ni1 | O3  | 94.08(13)  |
| O8 | Dy1 | O9  | 85.35(11)  |  | O8  | Ni1 | O3  | 81.17(13)  |
| O6 | Dy1 | O9  | 71.74(11)  |  | N1  | Ni1 | O3  | 88.37(15)  |
| O5 | Dy1 | O9  | 78.85(15)  |  | O2  | Ni1 | O8  | 83.41(14)  |
| O2 | Dy1 | O10 | 100.00(16) |  | O4  | Ni1 | O8  | 89.22(15)  |
| O3 | Dy1 | O10 | 142.76(12) |  | O8  | Ni1 | O8  | 82.81(16)  |
| O8 | Dy1 | O10 | 145.97(11) |  | N1  | Ni1 | O8  | 172.73(13) |
| O6 | Dy1 | O10 | 73.62(14)  |  | O3  | Ni1 | O8  | 98.68(14)  |
| O5 | Dy1 | O10 | 69.91(15)  |  | Ni1 | O8  | Ni1 | 97.19(16)  |
| O9 | Dy1 | O10 | 87.00(16)  |  | Ni1 | O8  | Dy1 | 103.11(13) |
| O2 | Dy1 | O1  | 61.97(14)  |  | Ni1 | O8  | Dy1 | 97.85(14)  |
| O3 | Dy1 | O1  | 79.83(15)  |  | Ni1 | O3  | Dy1 | 104.90(13) |
| O8 | Dy1 | O1  | 127.98(12) |  | Ni1 | O2  | Dy1 | 103.90(14) |

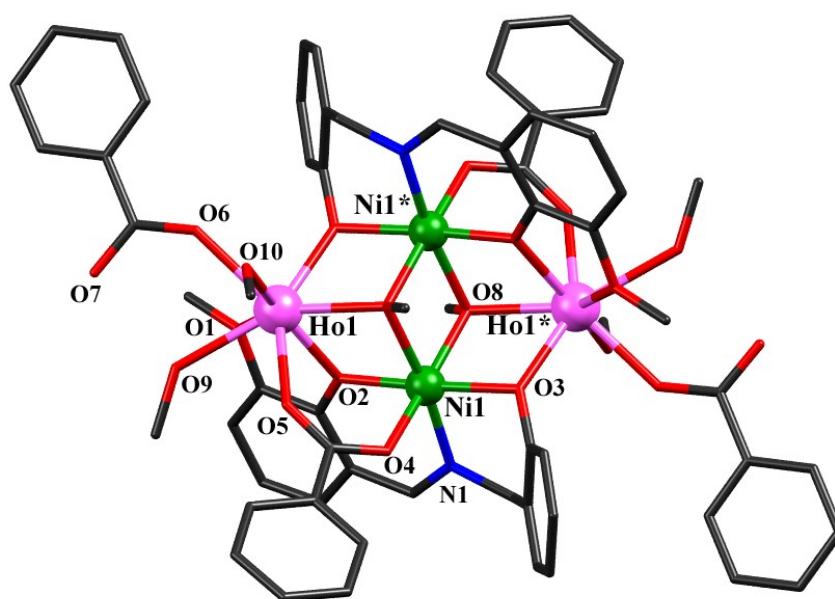

**Fig. S8** Molecular structure of Complex 4 with partial atomic numbering scheme. Solvent molecules are omitted for clarity.

**Table S10** Selected bond distances of **4**

| Atom 1 | Atom 2 | Distance [Å] |  | Atom 1 | Atom 2 | Distance [Å] |
|--------|--------|--------------|--|--------|--------|--------------|
| Ho1    | O2     | 2.248(3)     |  | Ho1    | O1     | 2.629(3)     |
| Ho1    | O3     | 2.260(3)     |  | Ni1    | O2     | 1.991(3)     |
| Ho1    | O8     | 2.322(3)     |  | Ni1    | O4     | 2.028(3)     |
| Ho1    | O6     | 2.323(3)     |  | Ni1    | O8     | 2.039(3)     |
| Ho1    | O5     | 2.323(3)     |  | Ni1    | N1     | 2.046(3)     |
| Ho1    | O9     | 2.363(3)     |  | Ni1    | O3     | 2.049(3)     |
| Ho1    | O10    | 2.373(3)     |  | Ni1    | O8     | 2.111(3)     |

**Table S11** Selected bond angles of **4**

| Atom 1 | Atom 2 | Atom 3 | Bond<br>Angles(°) |  | Atom 1 | Atom 2 | Atom 3 | Bond<br>Angles(°) |
|--------|--------|--------|-------------------|--|--------|--------|--------|-------------------|
| O2     | Ho1    | O3     | 84.44(10)         |  | O6     | Ho1    | O1     | 76.06(9)          |
| O2     | Ho1    | O8     | 73.41(9)          |  | O5     | Ho1    | O1     | 115.53(10)        |
| O3     | Ho1    | O8     | 71.11(9)          |  | O9     | Ho1    | O1     | 69.95(11)         |
| O2     | Ho1    | O6     | 136.87(9)         |  | O10    | Ho1    | O1     | 144.46(9)         |
| O3     | Ho1    | O6     | 78.19(9)          |  | O2     | Ni1    | O4     | 92.34(10)         |
| O8     | Ho1    | O6     | 134.07(9)         |  | O2     | Ni1    | O8     | 92.53(10)         |
| O2     | Ho1    | O5     | 77.51(10)         |  | O4     | Ni1    | O8     | 170.56(9)         |
| O3     | Ho1    | O5     | 145.75(9)         |  | O2     | Ni1    | N1     | 89.75(11)         |
| O8     | Ho1    | O5     | 75.90(10)         |  | O4     | Ni1    | N1     | 88.15(12)         |
| O6     | Ho1    | O5     | 133.79(9)         |  | O8     | Ni1    | N1     | 99.95(12)         |
| O2     | Ho1    | O9     | 99.73(11)         |  | O2     | Ni1    | O3     | 173.18(10)        |
| O3     | Ho1    | O9     | 142.29(9)         |  | O4     | Ni1    | O3     | 94.15(10)         |
| O8     | Ho1    | O9     | 146.16(9)         |  | O8     | Ni1    | O3     | 81.35(10)         |
| O6     | Ho1    | O9     | 73.39(10)         |  | N1     | Ni1    | O3     | 88.36(11)         |
| O5     | Ho1    | O9     | 70.27(10)         |  | O2     | Ni1    | O8     | 83.47(10)         |
| O2     | Ho1    | O10    | 151.53(9)         |  | O4     | Ni1    | O8     | 89.52(11)         |
| O3     | Ho1    | O10    | 107.23(11)        |  | O8     | Ni1    | O8     | 83.00(11)         |
| O8     | Ho1    | O10    | 85.70(9)          |  | N1     | Ni1    | O8     | 172.73(10)        |
| O6     | Ho1    | O10    | 71.58(9)          |  | O3     | Ni1    | O8     | 98.67(10)         |

|    |     |     |           |  |     |    |     |            |
|----|-----|-----|-----------|--|-----|----|-----|------------|
| O5 | Ho1 | O10 | 78.80(10) |  | Ni1 | O8 | Ni1 | 96.99(11)  |
| O9 | Ho1 | O10 | 86.83(11) |  | Ni1 | O3 | Ho1 | 104.70(10) |
| O2 | Ho1 | O1  | 62.03(9)  |  | Ni1 | O2 | Ho1 | 103.68(10) |
| O3 | Ho1 | O1  | 79.60(10) |  | Ni1 | O8 | Ho1 | 102.84(10) |
| O8 | Ho1 | O1  | 128.38(9) |  | Ni1 | O8 | Ho1 | 97.53(10)  |

**Table S12.** The calculated  $J_{\text{Ni-Ni}}$  parameters for compounds **1-4** by B3LYP functional

| Compound | d(Ni-Ni*) (Å) | <(Ni-O-Ni*)av | $J_{\text{Ni-Ni}}$ (cm <sup>-1</sup> ) |
|----------|---------------|---------------|----------------------------------------|
| <b>1</b> | 3.142         | 97.42         | 5.89                                   |
| <b>2</b> | 3.143         | 97.55         | 5.67                                   |
| <b>3</b> | 3.108         | 97.16         | 7.96                                   |
| <b>4</b> | 3.109         | 96.98         | 8.38                                   |

**Table S13.** The splitting of the lowest multiplets for Ln<sup>III</sup> ions in **2-4** compounds calculated in ORCA

| Compound                                                    | <b>2</b>  | <b>3</b>  | <b>4</b>  |
|-------------------------------------------------------------|-----------|-----------|-----------|
| Ln                                                          | <b>Tb</b> | <b>Dy</b> | <b>Ho</b> |
|                                                             | 0         | 0         | 0         |
|                                                             | 1.81      | 0         | 4.4       |
|                                                             | 65.25     | 107.64    | 39.12     |
|                                                             | 76.45     | 107.64    | 53.4      |
|                                                             | 133.66    | 144.92    | 82.58     |
|                                                             | 157.73    | 144.92    | 107.92    |
|                                                             | 184.05    | 189.75    | 134.42    |
|                                                             | 246.53    | 189.75    | 161.28    |
|                                                             | 253.54    | 274.53    | 172.52    |
|                                                             | 388.3     | 274.53    | 196.17    |
|                                                             | 389.7     | 332.33    | 214.18    |
|                                                             | 623.79    | 332.33    | 220.45    |
|                                                             | 624.02    | 486.11    | 226.26    |
|                                                             |           | 486.11    | 247.24    |
|                                                             |           | 615.35    | 249.37    |
|                                                             |           | 615.35    | 313.58    |
|                                                             |           |           | 314.12    |
| <b>Calculated spin-orbit interactions (cm<sup>-1</sup>)</b> | 1726.9    | 1925.4    | 2139.5    |

**Table S14.** The CASSCF calculated *D*-tensor and *g*-tensor values of Ni<sup>II</sup> in **2-4** done by OpenMOLCAS/SINGLE\_ANISO

| Compound | <i>D</i> (Ni) | <i>E/D</i> (Ni) | <i>g</i> -factors   |
|----------|---------------|-----------------|---------------------|
| <b>2</b> | 4.77          | -0.103          | 2.310, 2.306, 2.279 |
| <b>3</b> | 4.64          | -0.125          | 2.294, 2.288, 2.259 |
| <b>4</b> | 4.59          | -0.091          | 2.295, 2.290, 2.261 |

**Table S15.** The splitting of the lowest multiplets for Ln<sup>III</sup> ion in **2-4** compounds calculated in OpenMOLCAS/SINGLE\_ANISO

| Tb <sup>III</sup> ( <sup>7</sup> F <sub>6</sub> ) | Dy <sup>III</sup> ( <sup>6</sup> H <sub>15/2</sub> ) |                      |                      | Ho <sup>III</sup> ( <sup>5</sup> I <sub>8</sub> ) |                              |
|---------------------------------------------------|------------------------------------------------------|----------------------|----------------------|---------------------------------------------------|------------------------------|
| <i>E</i> (cm <sup>-1</sup> )                      | <i>E</i> (cm <sup>-1</sup> )                         | <i>g<sub>x</sub></i> | <i>g<sub>y</sub></i> | <i>g<sub>z</sub></i>                              | <i>E</i> (cm <sup>-1</sup> ) |
| 0                                                 | 0.0                                                  | 0.061                | 0.134                | 19.361                                            | 0                            |
| 2.09                                              | 108                                                  | 1.270                | 2.581                | 15.439                                            | 4.14                         |
| 60.7                                              | 150                                                  | 2.750                | 3.359                | 14.159                                            | 39.5                         |
| 72.9                                              | 190                                                  | 2.328                | 4.082                | 10.555                                            | 53.2                         |
| 125                                               | 272                                                  | 0.286                | 1.445                | 12.381                                            | 81.2                         |
| 150                                               | 327                                                  | 0.554                | 0.891                | 16.505                                            | 106                          |
| 174                                               | 475                                                  | 0.045                | 0.080                | 16.920                                            | 133                          |
| 238                                               | 602                                                  | 0.015                | 0.030                | 19.083                                            | 158                          |
| 244                                               |                                                      |                      |                      |                                                   | 171                          |
| 375                                               |                                                      |                      |                      |                                                   | 194                          |
| 376                                               |                                                      |                      |                      |                                                   | 211                          |
| 603                                               |                                                      |                      |                      |                                                   | 216                          |
| 603                                               |                                                      |                      |                      |                                                   | 222                          |
|                                                   |                                                      |                      |                      |                                                   | 241                          |
|                                                   |                                                      |                      |                      |                                                   | 244                          |
|                                                   |                                                      |                      |                      |                                                   | 306                          |
|                                                   |                                                      |                      |                      |                                                   | 307                          |

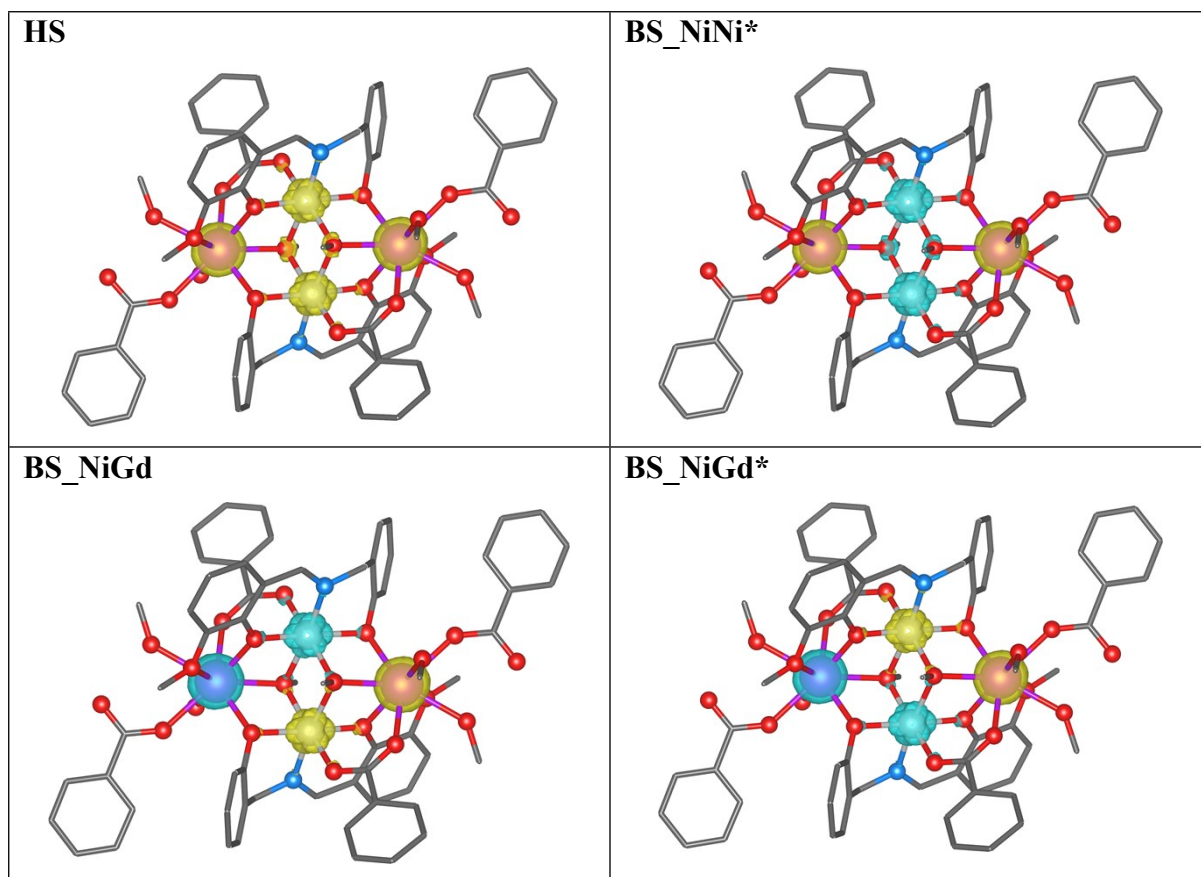

**Fig. S9** The molecular structure of **1** and B3LYP calculated spin isodensity surface with the cutoff values of  $0.02 \text{ ea}_0^{-3}$ . Hydrogen atoms are omitted for clarity.

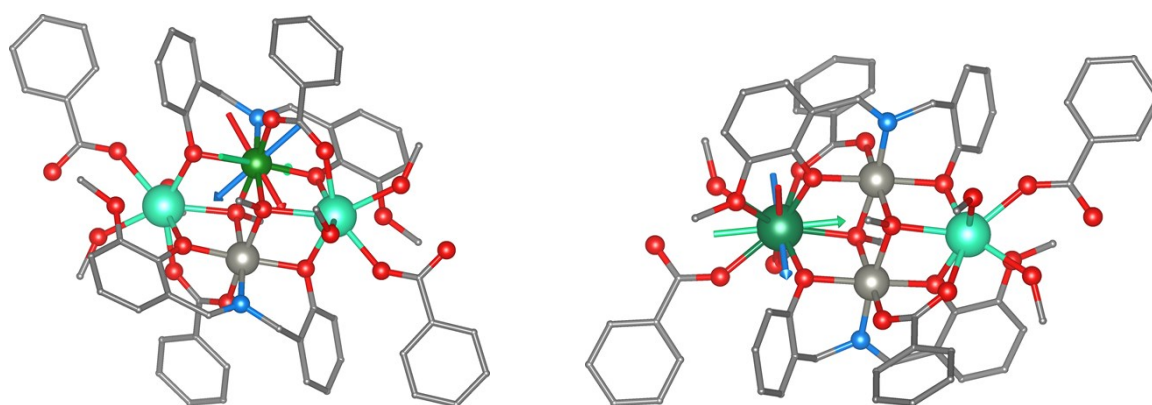

**Fig. S10** The molecular structure of **3** derived from the experimental X-ray geometry used for CASSCF calculations done in ORCA overlaid with principal axis of  $D$ -tensor ( $x/y/z$ -axes colored as red/green/blue arrows) for Ni atom (left) and overlaid with principal axis of  $g$ -tensor of the first Kramers doublet ( $x/y/z$ -axes colored as red/green/blue arrows).

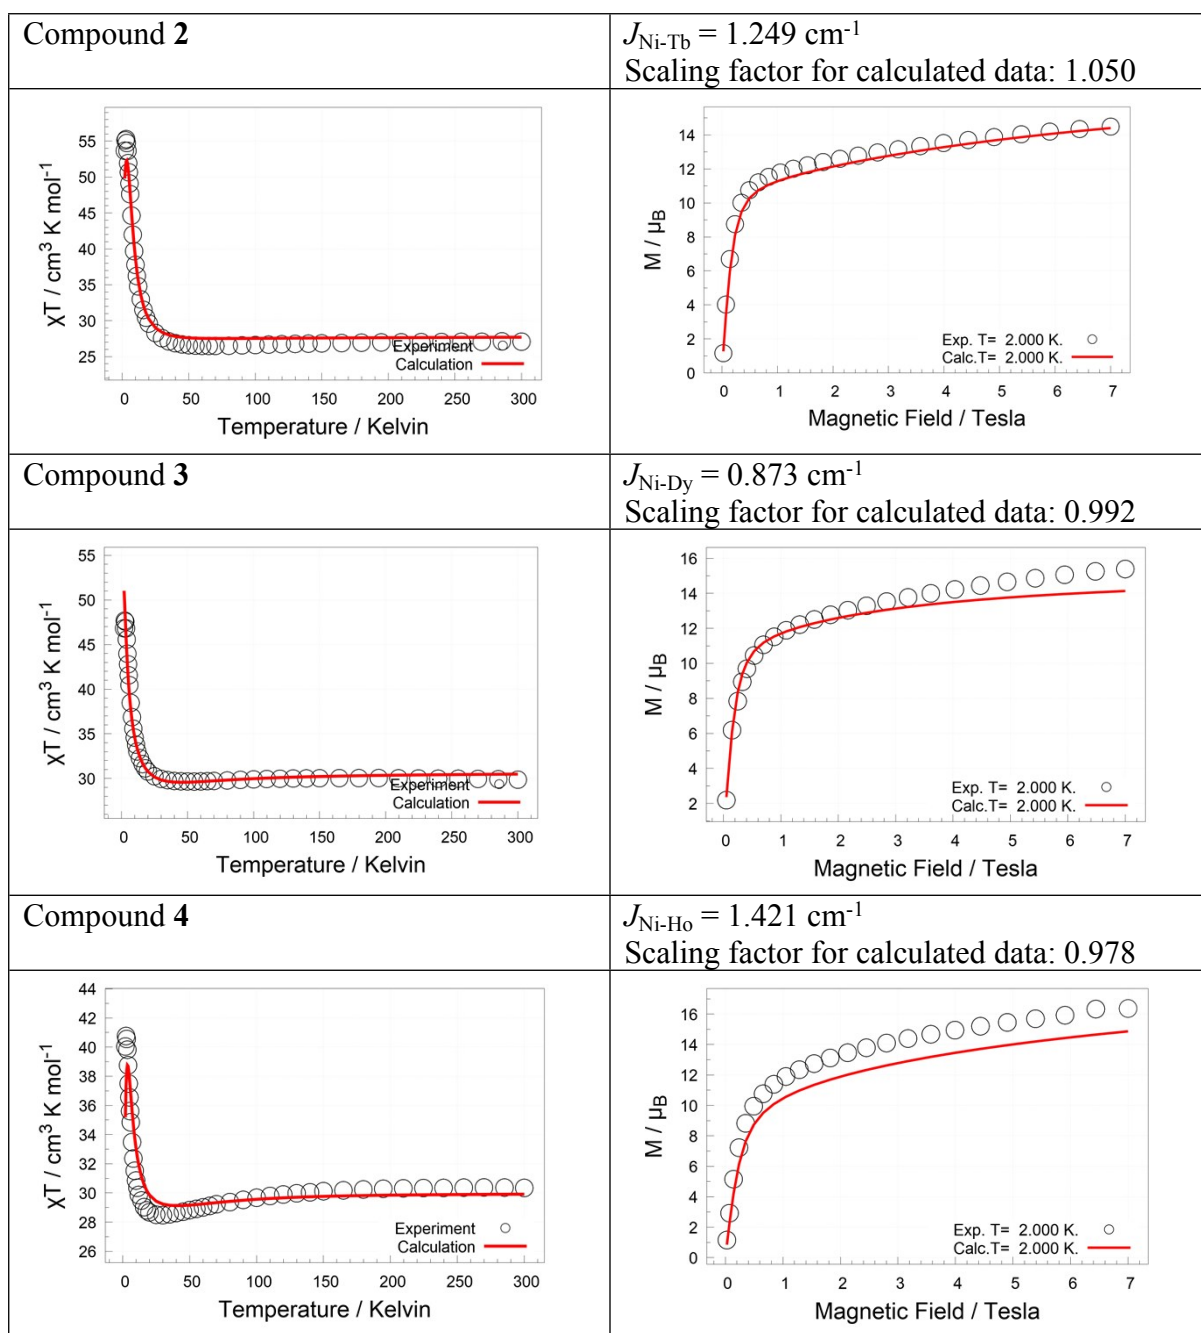

**Fig. S11** The best-fits of experimental magnetic data (temperature dependence of mean susceptibility measured at  $B = 0.1 \text{ T}$  and the isothermal molar magnetization measured at  $T = 2 \text{ K}$ ) of **2-4** calculated with POLY\_ANISO.

## References

- S1.** R. A. Coxall, S. G. Harris, D. K. Henderson, S. Parsons, P. A. Tasker and R. E. P. Winpenney, *J. Chem. Soc., Dalton Trans.*, 2000, 2349–2356.
- S2.** M. Pinsky and D. Avnir, *Inorg. Chem.*, 1998, **37**, 5575–5582.
- S3.** D. Casanova, M. Llundell, P. Alemany and S. Alvarez, *Chem. Eur. J.*, 2005, **11**, 1479–1494.
